# Supplementary material
Source: PubMed Central journal article supplement (PMC3484986)
Supplement: supp_WNL.0b013e3182735e9a_WNL204387.pdf [file supp_WNL.0b013e3182735e9a_WNL204387.pdf]

---

**Mutations of Unknown Significance**


---

|    |         |       |     |   |    |    |   |   |   |    |   |    |    |    |    |   |             |
|----|---------|-------|-----|---|----|----|---|---|---|----|---|----|----|----|----|---|-------------|
| 20 | Control | R262H | 3.4 | W | -- | 81 | F | 2 | 0 | NA | - | NA | NA | -  | -  | - | None        |
| 21 | AD      | H422Y | 3.3 | W | 76 | 86 | F | 6 | C | -  | - | -  | -  | NA | NA | - | None        |
| 22 | LBD-AD  | R39C  | 3.3 | W | 88 | 95 | M | 4 | C | +  | + | +  | +  | +  | +  | + | Neocortical |
| 23 | LBD-AD  | R262H | 3.3 | W | 70 | 82 | F | 6 | C | +  | + | +  | +  | +  | +  | + | Neocortical |
| 24 | LBD-AD  | E388K | 3.3 | W | 75 | 81 | F | 6 | C | +  | + | +  | +  | +  | NA | + | Neocortical |
| 25 | pDLB    | E388K | 3.3 | W | 72 | 80 | M | 2 | A | +  | + | +  | +  | +  | +  | + | Neocortical |

---

AD, dementia with high-level Alzheimer's disease neuropathologic changes without Lewy body disease neuropathologic changes; ADNCs, Alzheimer's disease neuropathologic changes; AG, amygdala; CERAD, Consortium to Establish a Registry for Alzheimer's Disease; CG, cingulate gyrus; FC, frontal cortex; HP, hippocampus; LBD-AD, dementia with Lewy body disease neuropathologic changes and high-level Alzheimer's disease neuropathologic changes; LBDNCs, Lewy body disease neuropathologic changes; MD, medulla; NA, not available; pDLB, pure dementia with Lewy bodies (dementia with Lewy body disease neuropathologic changes and no or low-level Alzheimer's disease neuropathologic changes); PHG, parahippocampal gyrus; SN, substantia nigra; W, white.

<sup>a</sup>*APOE* genotype

<sup>b</sup>Based on Leverenz et al. (2008)

<sup>c</sup>Recombinant allele containing L444P, A456P, and V460V

---
